# Supplementary material
Source: publisher figshare collection journal article supplement (https://acs.figshare.com/ndownloader/files/4217197)
Supplement: Supplementary file 1 [file 4217197]

# Mixed cation effect in the metastable anion conductor $\text{Ba}_{1-x}\text{Ca}_x\text{F}_2$ ( $0 \leq x \leq 1$ ) Correlating long-range ion transport with local structures revealed by ultrafast $^{19}\text{F}$ MAS NMR

A. Düvel, B. Ruprecht, P. Heitjans, and M. Wilkening\*

Leibniz University Hannover, Institute of Physical Chemistry and Electrochemistry, Callinstr. 3a, D-30167 Hannover

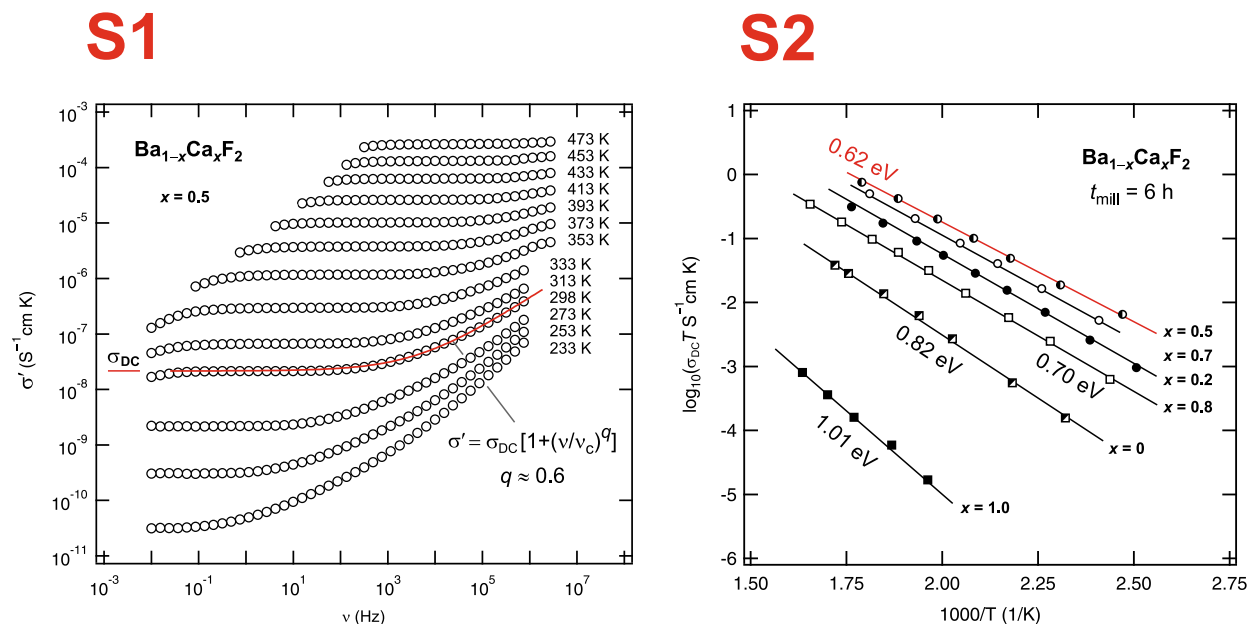

Fig. S1: Conductivity isotherms (first run, beginning from 233 K) obtained with the Novocontrol impedance analyzer. As an example, the impedance spectra of a sample with the composition  $x = 0.5$  are shown. The red line represents a fit according to a power-law behaviour of the real part of the complex conductivity. Note that at low frequencies and high temperatures electrode polarization affects the dc-plateaus.

Fig. S2: Arrhenius plot of the dc-conductivities read out from the corresponding plateaus of the isotherms shown in Fig. S1. Activation energies range from ca. 1 eV to approximately 0.6 eV depending on the composition  $x$ .  $\sigma_{\text{DC}} T(x)$  (determined at  $T = 554$  K) and  $E_a(x)$  are shown in Fig. 2.

# S4

## S3

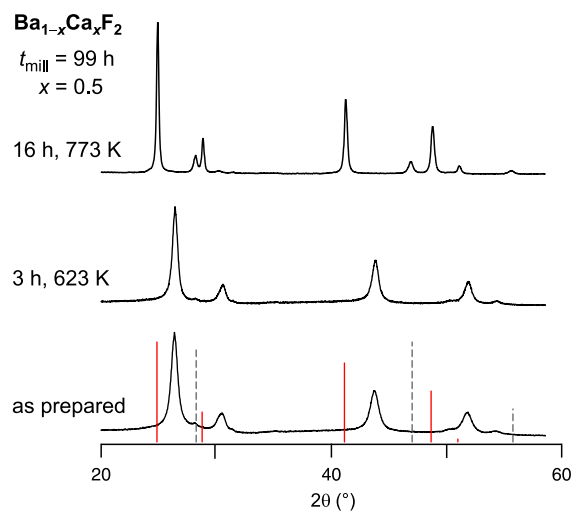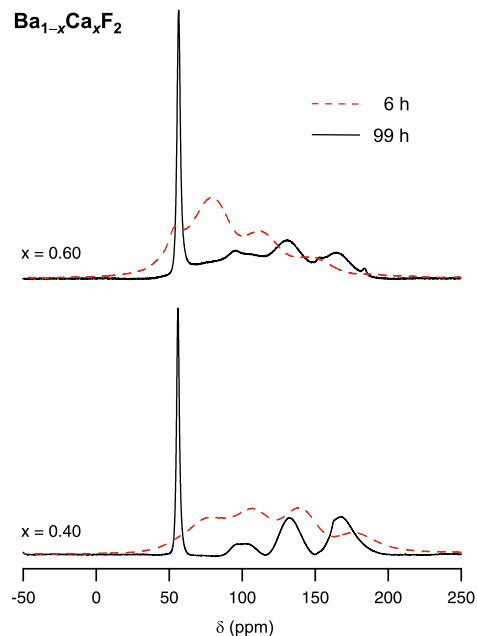

Fig. S3: XRPDs of  $\text{Ba}_{1-x}\text{Ca}_x\text{F}_2$  ( $x=0.5$ ) showing the metastability of the mixed fluoride prepared by high-energy ball milling. Annealing for 3 h at 623 K does not lead to any significant changes. The small change in XRD peak widths might indicate grain growth and/or structural relaxation. Decomposition is clearly observed after annealing the metastable sample(s) for 16 h at 773 K.

Fig. S2:  $^{19}\text{F}$  MAS NMR spectra of  $\text{Ba}_{1-x}\text{Ca}_x\text{F}_2$  ( $x=0.4$  and  $x=0.6$ ) prepared by high-energy ball milling of  $\text{CaF}_2$  and  $\text{BaF}_2$  for six and 99 h, respectively. The broad NMR lines represent the mixed sites in the ternary fluoride as discussed in the text.
